# Supplementary material
Source: Royal Society of Chemistry journal article supplement (doi:10.1039/d5fd00114e)
Supplement: d5fd00114e1.pdf [file d5fd00114e1.pdf]

# Supporting information for

## The effect of ions on water alignment and its nonlinear optical response at metal electrodes

Qiwei Yao, Mohammed Bin Jassar, and Simone Pezzotti\*

*Laboratoire CPCV, Département de Chimie, École Normale Supérieure, PSL University,  
Sorbonne University, CNRS, 75005 Paris, France*

E-mail: [simone.pezzotti@ens.psl.eu](mailto:simone.pezzotti@ens.psl.eu)

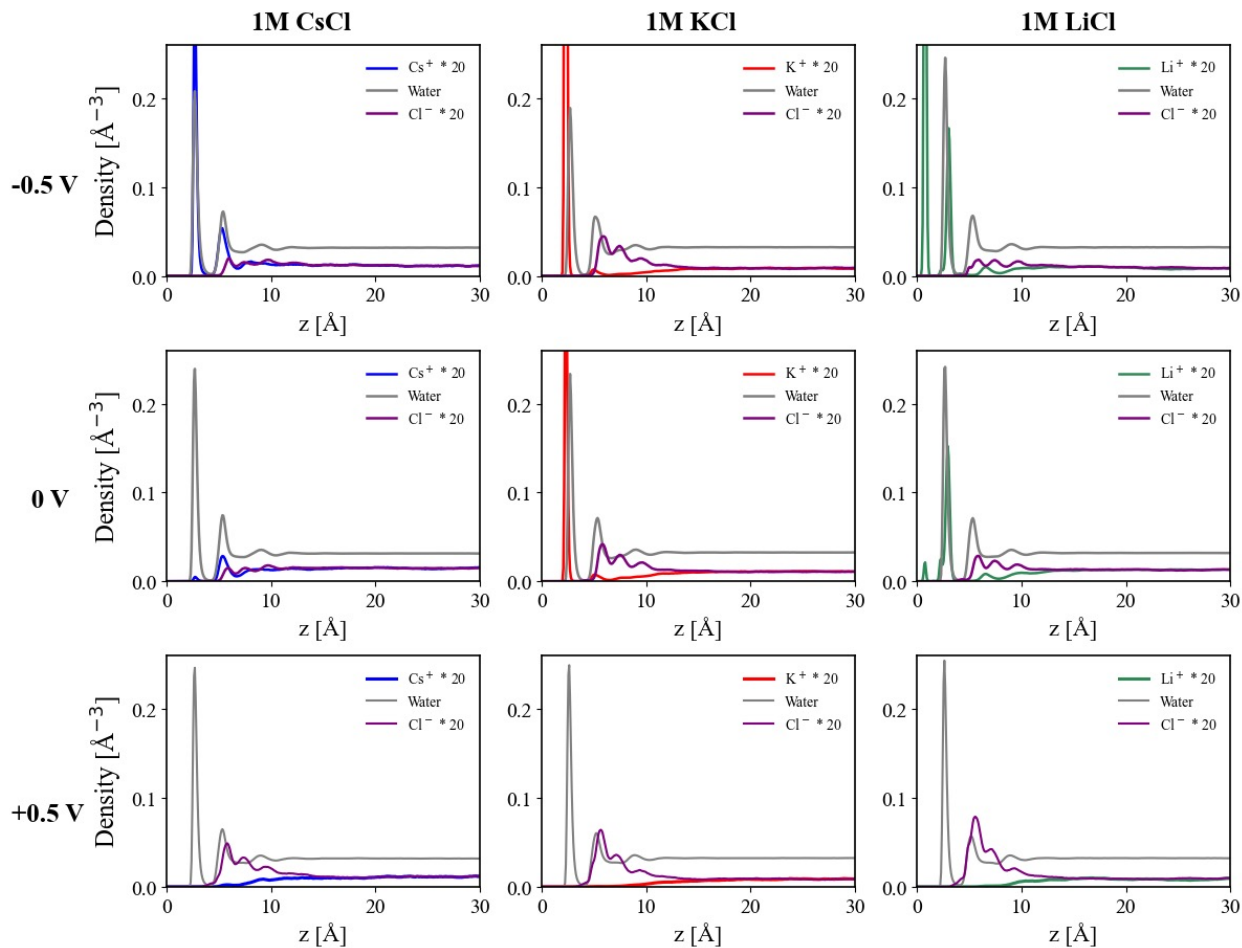

Figure S1: Representative density profiles of water and ions in our simulation boxes, showing separately the half-boxes corresponding to the positive and the negative electrodes. Ion densities are magnified by 20 times to improve their visualization (especially in the bulk-like region far from the electrode surfaces).
